# Supplementary material for: Ribosomal Readthrough at a Short UGA Stop Codon Context Triggers Dual Localization of Metabolic Enzymes in Fungi and Animals
Source: PubMed Central journal article supplement (PMC4207609; doi:10.1371/journal.pgen.1004685), 2014-10-23

## Supplementary Figure S3

**A**

*D. melanogaster* NADP-dependent isocitrate dehydrogenase (*Ish*; Gene ID: 44291)

AAA TGA CTA TCC GGC ACT CAG TCC GAG CAG CAG GCC TCG CAT CTC TAG  
 K \* L S G T Q S E Q Q A S H L \*

**B**

|                                | Readthrough context | C-terminal extension  | PTS1 score |
|--------------------------------|---------------------|-----------------------|------------|
| <i>Drosophila melanogaster</i> | TGACTA              | *N <sub>10</sub> SHL* | +2.0       |
| <i>Apis mellifera</i>          | TGACTA              | *N <sub>9</sub> SKY*  | +1.6       |
| <i>Tribolium castaneum</i>     | TGACTA              | *N <sub>3</sub> ARL*  | +11.2      |
| <i>Caenorhabditis elegans</i>  | no readthr.         | ...QAH*               | -59.2      |
| <i>Aplysia californica</i>     | TGACTA              | *N <sub>16</sub> SKL* | +9.7       |
| <i>Xenopus laevis</i>          | no readthr.         | ...LKL*               | -9.2       |
| <i>Gallus gallus</i>           | no readthr.         | ...PKL*               | +1.3       |
| <i>Homo sapiens</i>            | no readthr.         | ...AKL*               | +8.5       |
| <i>Ustilago maydis</i>         | no readthr.         | ...GKL*               | +1.1       |

|                                                                                                                                       |                                                                                                                                    |
|---------------------------------------------------------------------------------------------------------------------------------------|------------------------------------------------------------------------------------------------------------------------------------|
| <span style="display: inline-block; width: 15px; height: 15px; background-color: #e0e0e0; border: 1px solid #ccc;"></span> insects    | <span style="display: inline-block; width: 15px; height: 15px; background-color: #d9ead3; border: 1px solid #ccc;"></span> birds   |
| <span style="display: inline-block; width: 15px; height: 15px; background-color: #808080; border: 1px solid #ccc;"></span> nematodes  | <span style="display: inline-block; width: 15px; height: 15px; background-color: #f4cccc; border: 1px solid #ccc;"></span> mammals |
| <span style="display: inline-block; width: 15px; height: 15px; background-color: #c0c0c0; border: 1px solid #ccc;"></span> molluscs   | <span style="display: inline-block; width: 15px; height: 15px; background-color: #d9ead3; border: 1px solid #ccc;"></span> fungi   |
| <span style="display: inline-block; width: 15px; height: 15px; background-color: #e0e0e0; border: 1px solid #ccc;"></span> amphibians |                                                                                                                                    |

**C**

*U. maydis* Idp1; Um06111

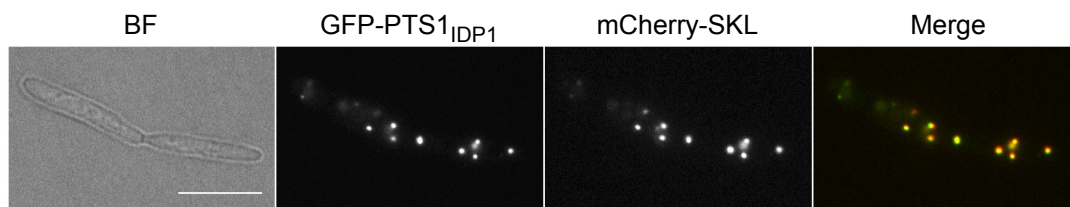

Supplement: pgen.1004685.s003.pdf [file pgen.1004685.s003.pdf]
