# Supplementary material for: Ribosomal Readthrough at a Short UGA Stop Codon Context Triggers Dual Localization of Metabolic Enzymes in Fungi and Animals
Source: PubMed Central journal article supplement (PMC4207609; doi:10.1371/journal.pgen.1004685), 2014-10-23

Supplementary Figure S2

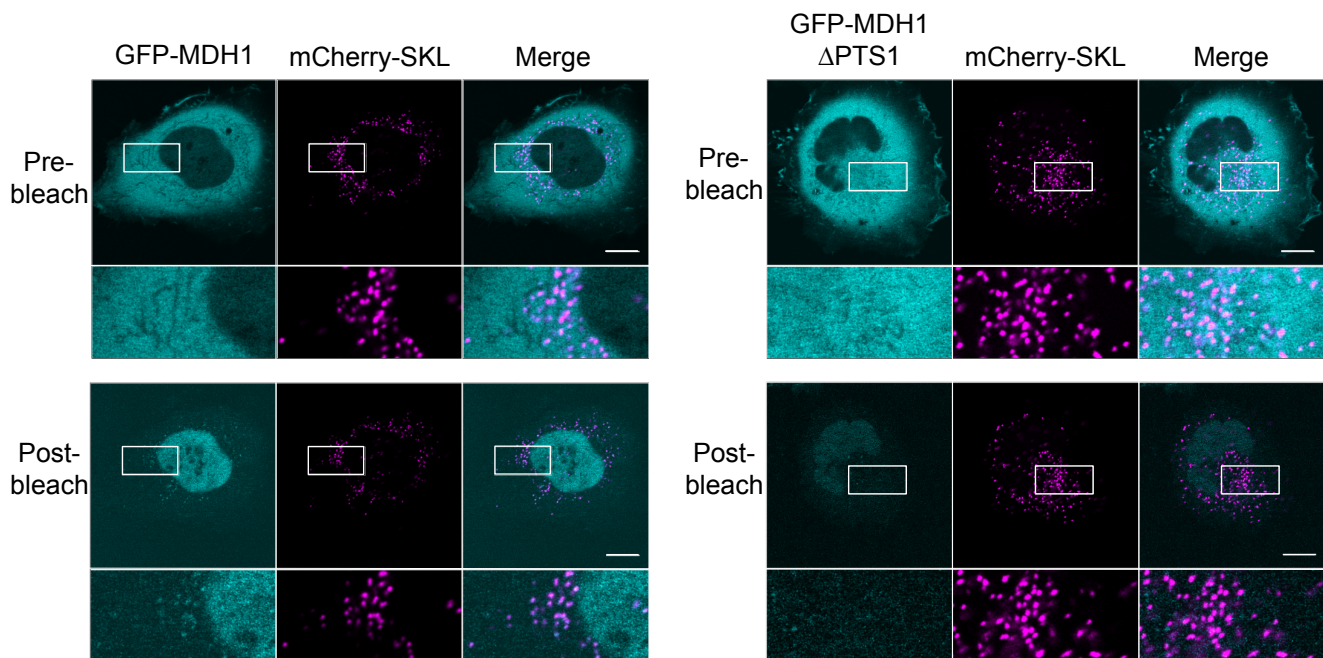

Supplement: pgen.1004685.s002.pdf [file pgen.1004685.s002.pdf]
